# Supplementary material for: Coronavirus Pseudotypes for All Circulating Human Coronaviruses for Quantification of Cross-Neutralizing Antibody Responses
Source: MDPI journal article supplement (doi:10.3390/v13081579), 2021-08-10
Supplement: s1 [file s1]

# Supplementary Materials

**Figure S1 – HCoV neutralisation by human sera**

Example neutralisation data by human sera is displayed in Figure 9 and described in the main text. Additional data from this panel of serum samples is shown below in **Supplementary Figure S1**. PVs were incubated for an hour at 37°C with human sera prior to addition of target cells; neutralisation of entry was assayed as a reduction in luciferase output after 48 hours. The graphs shown below show the neutralisation curves from 5 SARS-CoV-2 seropositive samples and 5 SARS-CoV-2 seronegative samples against HCoV-HKU1, HCoV-229E and HCoV-NL63.

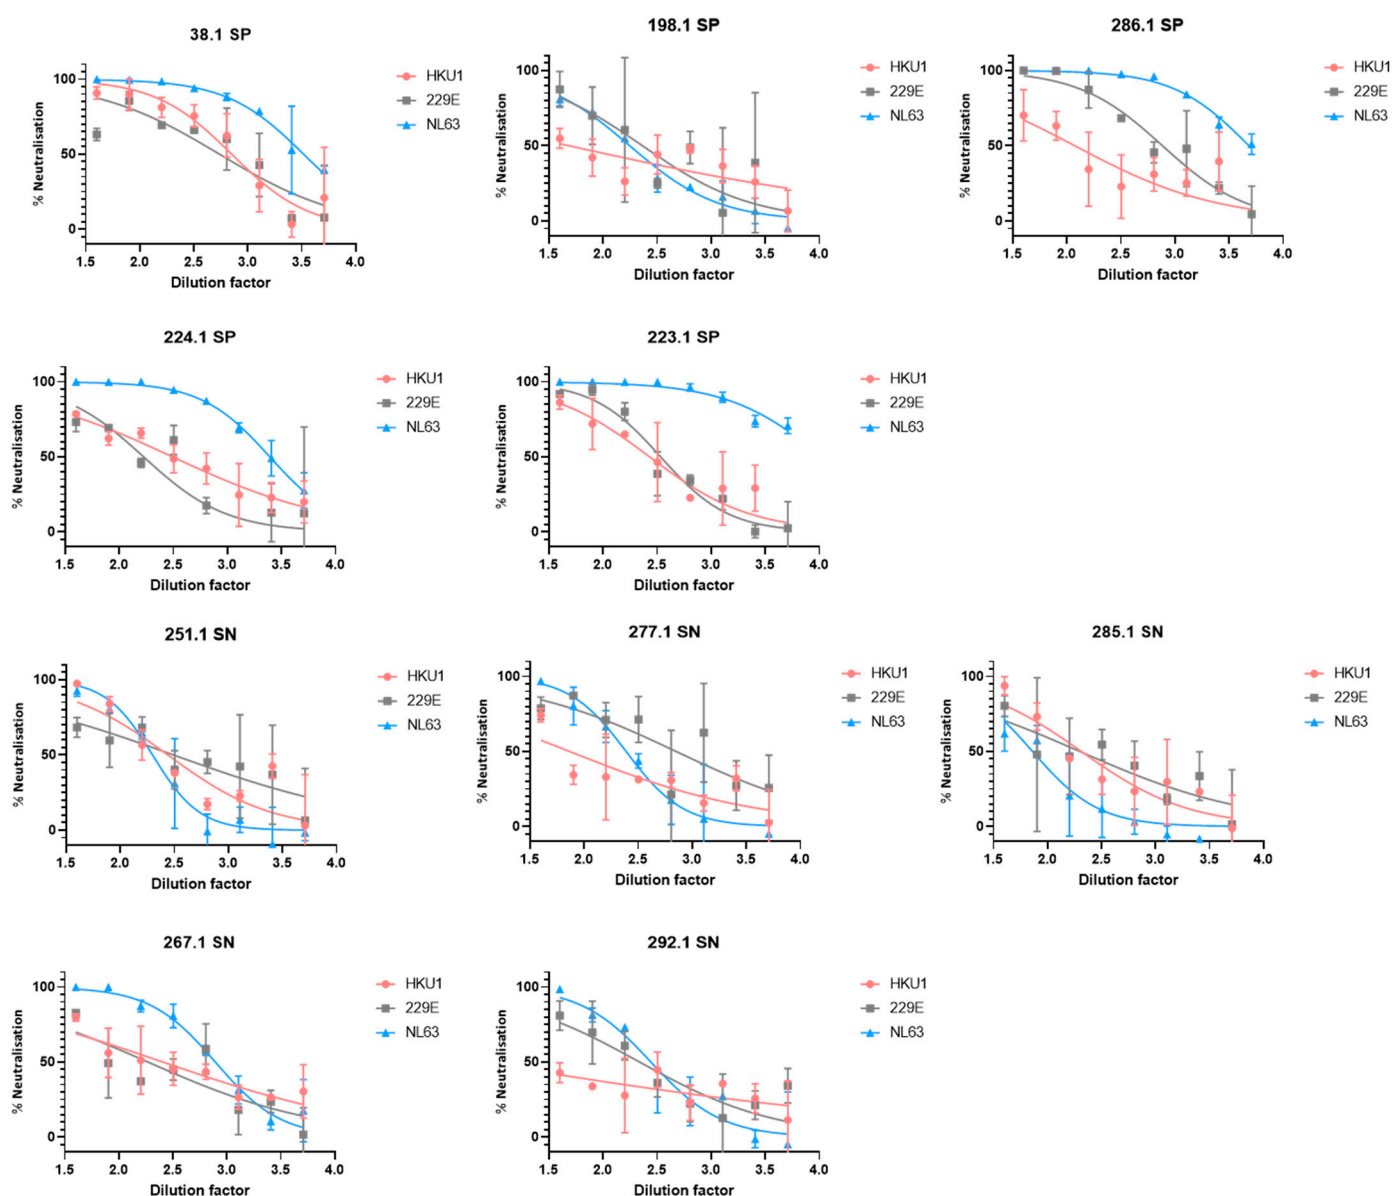

**Figure S1.** Neutralisation curves for 5 SARS-CoV-2 seropositive samples (38.1 SP, 198.1 SP, 286.1 SP, 224.1 SP and 223.1 SP) and 5 SARS-CoV-2 seronegative samples (251.1 SN, 277.1 SN, 285.1 SN, 267.1 SN and 292.1 SN) against HCoV-HKU1 (HKU1), HCoV-229E (229E), and HCoV-NL63 (NL63). Curves fit by non-linear regression using GraphPad Prism 9.

**Table S1 – Statistical analysis**

Further details on statistical tests used in analysis of datasets in Figures 4-7 are shown in **Supplementary Table S1**.

**Table S1.** Statistical analysis.

| <b>Figure</b> | <b>Statistical analysis</b>                                                                                                                                                                         |
|---------------|-----------------------------------------------------------------------------------------------------------------------------------------------------------------------------------------------------|
| Figure 4a     | Where datasets passed the normality test, a one way ANOVA test with Tukey's multiple comparison test was performed; otherwise, a Kruskal Wallis test with Dunn's multiple comparison test was used. |
| Figure 4b     | A Kruskal Wallis test with Dunn's multiple comparison test was performed for this analysis                                                                                                          |
| Figure 5b     | A Kruskal Wallis test with Dunn's multiple comparison test was performed for this analysis                                                                                                          |
| Figure 5c     | A One Way ANOVA test with Tukey's multiple comparison test was performed for these datasets                                                                                                         |
| Figure 7a     | Where datasets had a normal distribution, an unpaired T-test was performed; otherwise, a Mann Whitney test was performed.                                                                           |
| Figure 7b     | A Mann Whitney test was performed on these datasets                                                                                                                                                 |
